# Supplementary material
Source: PubMed Central journal article supplement (PMC7112103)
Supplement: mmc3.pdf [file mmc3.pdf]

Supplementary Table 1. CircRNAs and their miRNA targets

| <b>circRNA</b>                | <b>Target miRNA</b> |
|-------------------------------|---------------------|
| circRNA 2:29213178-29216402   | ssc-miR-374a-3p     |
|                               | ssc-miR-424-5p      |
|                               | ssc-miR-196b-3p     |
|                               | ssc-miR-497         |
|                               | ssc-miR-376a-5p     |
|                               | ssc-miR-4331        |
|                               | ssc-miR-4335        |
| circRNA 2:59040088-59041075   | ssc-miR-122         |
|                               | ssc-miR-504         |
|                               | ssc-miR-328         |
|                               | ssc-miR-4334-5p     |
|                               | ssc-miR-218-5p      |
| circRNA 2:146476770-146479009 | ssc-miR-216         |
|                               | ssc-miR-24-3p       |
|                               | ssc-miR-769-3p      |
|                               | ssc-miR-338         |
|                               | ssc-miR-758         |
|                               | ssc-miR-383         |
| circRNA 3:76474842-76491398   | ssc-miR-10a-5p      |
|                               | ssc-miR-10b         |
|                               | ssc-miR-24-2-5p     |
|                               | ssc-miR-193a-3p     |
|                               | ssc-miR-885-5p      |
|                               | ssc-miR-365-5p      |
|                               | ssc-miR-664-5p      |
|                               | ssc-miR-424-5p      |
|                               | ssc-miR-497         |
|                               | ssc-miR-195         |
|                               | ssc-miR-127         |
|                               | ssc-miR-361-5p      |
|                               | ssc-miR-532-3p      |
|                               | ssc-miR-708-3p      |
|                               | ssc-miR-328         |
|                               | ssc-miR-324         |
|                               | ssc-miR-22-3p       |
|                               | ssc-miR-4331        |
|                               | ssc-miR-362         |
|                               | ssc-miR-4332        |
|                               | ssc-miR-652         |
|                               | ssc-miR-1224        |
|                               | ssc-miR-383         |
| ssc-miR-487b                  |                     |
| ssc-miR-484                   |                     |
| ssc-miR-30c-1-3p              |                     |
| ssc-miR-149                   |                     |

|                               |                 |
|-------------------------------|-----------------|
| circRNA 6:48351537-48356123   | ssc-miR-140-3p  |
|                               | ssc-miR-34a     |
|                               | ssc-miR-133a-5p |
|                               | ssc-miR-378     |
|                               | ssc-miR-345-3p  |
|                               | ssc-miR-542-3p  |
|                               | ssc-miR-504     |
|                               | ssc-miR-127     |
|                               | ssc-miR-22-3p   |
|                               | ssc-miR-758     |
|                               | ssc-miR-194b-3p |
|                               | ssc-miR-4331    |
|                               | ssc-miR-4334-5p |
|                               | ssc-miR-4335    |
| circRNA 7:62801435-62806164   | ssc-miR-125b    |
|                               | ssc-miR-24-3p   |
|                               | ssc-miR-140-3p  |
|                               | ssc-miR-27a     |
|                               | ssc-let-7c      |
|                               | ssc-miR-128     |
|                               | ssc-miR-221-5p  |
|                               | ssc-miR-499-3p  |
|                               | ssc-miR-27b-3p  |
|                               | ssc-miR-125a    |
|                               | ssc-miR-127     |
|                               | ssc-miR-339-5p  |
|                               | ssc-miR-532-3p  |
|                               | ssc-miR-342     |
|                               | ssc-miR-328     |
|                               | ssc-miR-744     |
|                               | ssc-miR-22-3p   |
|                               | ssc-miR-4334-3p |
|                               | ssc-miR-383     |
|                               | ssc-miR-484     |
| ssc-miR-1296-3p               |                 |
| ssc-miR-4339                  |                 |
| circRNA 9:132682311-132683940 | ssc-miR-125b    |
|                               | ssc-miR-7       |
|                               | ssc-miR-30b-3p  |
|                               | ssc-miR-664-5p  |
|                               | ssc-miR-1306-3p |
|                               | ssc-miR-532-5p  |
|                               | ssc-miR-500     |
|                               | ssc-miR-4331    |
|                               | ssc-miR-383     |

|                              |                 |
|------------------------------|-----------------|
| circRNA 11:19712163-19718631 | ssc-miR-217     |
|                              | ssc-miR-7       |
|                              | ssc-miR-140-3p  |
|                              | ssc-miR-320     |
|                              | ssc-miR-664-5p  |
|                              | ssc-miR-127     |
|                              | ssc-miR-361-3p  |
|                              | ssc-miR-4331    |
|                              | ssc-miR-383     |
|                              | ssc-miR-484     |
|                              | ssc-miR-1296-5p |
|                              | ssc-miR-4339    |
